# Supplementary material
Source: PubMed Central journal article supplement (PMC7981259)
Supplement: NIHMS1671215-supplement-1.pdf [file NIHMS1671215-supplement-1.pdf]

## SUPPLEMENTAL DATA, Liu et al.

### ***In Vivo* Selection of Highly Metastatic Human Ovarian Cancer Sublines Reveals Role for AMIGO2 in Intra-Peritoneal Metastatic Regulation**

#### **Supplemental Figure Legends**

**Supplemental Figure 1. Comparison of parental and IP3 sublines using phosphokinase array.** OVCAR5 and OVCAR8 parental or IP3 cells were lysed and analyzed using the with Proteome Profiler Human Phospho-Kinase Array according to manufacturer's specifications. Log<sub>2</sub> fold change of phosphorylated proteins in the phospho-kinase array is shown.

**Supplemental Figure 2. Quantitation of urinary-type plasminogen activator (uPA) activity.** Net uPA activity in conditioned media from OVCAR5 and OVCAR8 parental and IP3 cells was quantified using a coupled assay to monitor plasminogen activation and the resulting plasmin hydrolysis of a colorimetric plasmin substrate (Val-Leu-Lys-p-nitroanilide, VLKpNA) by incubating plasminogen (0.3 uM) in 96 well microtiter plates in 20 mM HEPES buffer (pH 7.4) with conditioned medium (20 ul) at 37 °C. Following addition of VLKpNA (0.3 mM), plasminogen activation was quantified by monitoring the increase in absorbance at 405 nm using a Molecular Devices Thermomax microtiter plate reader. Assays were performed in triplicate.

**Supplemental Figure 3. sgRNAs design of AMIGO2 genomic region.** (A) Schematic map and (B) sequence of the four guide RNAs (green arrows) that target exon 3 of AMIGO2, as well as the primers (purple arrows) that were used for genomic PCR and Sanger Sequencing.

**Supplemental Figure 4. ICE analysis of OVCAR5-IP3 cell lines generated by CRISPR/Cas9.** (A) Genomic PCR performed on OVCAR5-IP3 cells transfected with four AMIGO2 sgRNAs/Cas9

RNP complexes. A single 568-bp PCR product was amplified spanning four guide RNAs in exon 3 of AMIGO2. **(B-D)** The representative outputs from the ICE analysis of OVCAR5-IP3-AMIGO2-KD Clone 2.6. The vertical dotted lines denote the cut site. **(B)** Left: The discordance plot for the edited (green) and the control (orange) trace files. The alignment window marks the region of the edited and control traces close together before the cut site. A CRISPR edit resulting in a jump in the discordance around the cut site (the inference window) and continuing to remain far apart after the cut site, which represents a high level of sequence discordance. Right: The Indel plot displays the inferred distribution of indels in the entire edited population of genome. **(C)** The sequence contribution specifies the inferred sequences present in edited population and relative proportions. **(D)** Sanger trace file segments spanning the region around the cut site and guide sequence from the control and the edited clones. The guide sequence is underlined in black, and the PAM sequence is marked by a dotted red underline in the control.

**Supplemental Figure 5. Evaluation of cellular properties in AMIGO2-KD cells.** **(A)**

ALDEFLUOR assay. Parental OVCAR5 cells, OVCAR5-IP3, or OVCAR5-IP3-AMIGO2-KD cells ( $2 \times 10^5$ ), as indicated, were incubated with ALDEFLUOR reagent in the presence or absence of diethylaminobenzaldehyde (DEAB, negative control) at 37 °C for 35-55 min prior to analysis in a Beckman FC500 flow cytometer. ALDH bright and negative control (+DEAB) cells were quantified according to manufacturer's specifications. **(B)** Colorimetric ALDH assay. Cells ( $1 \times 10^6$ ) were lysed on ice, centrifuged to remove insoluble material and aliquots of supernatant (25ul of lysate adjusted to 50ul with assay buffer) were added to an equal volume of the reaction mixture followed by analysis of absorption at 450 nm using a Molecular Devices Thermomax microtiter plate reader. Absorbance measurements are compared to a standard curve (NADH) to yield ALDH activity values. Results represent the mean +/- SEM of five replicates. **(C)** Analysis of adhesion. Parental OVCAR5, OVCAR5-IP3 and OVCAR5-IP3-AMIGO2-KD cells were assayed for adhesion to type I collagen-coated wells. Cells ( $1 \times 10^5$ ) were added to wells

and allowed to adhere for 45 min, followed by washing to remove non-adherent cells and enumeration of adherent cells (minimum of 20 high-powered fields per condition). Adhesion is shown as % of control adhesion (24h time point). **(D)** Analysis of invasion. Parental OVCAR5, OVCAR5-IP3, and OVCAR5-IP3-AMIGO2-KD cells were assayed for invasive activity using a Boyden chamber (8-um pore) coated with Matrigel (10 ug). Cells ( $2 \times 10^5$ ) were added to the chamber in serum-free medium for 24-72h. At the termination of the assay, non-invading cells were removed from the top of the filter using a cotton swab. Diff-Quik was used to fix and stain filters and migrating cells adherent to the bottom of the filter were enumerated by counting a minimum of 20 high-powered fields. All experiments were performed in at least triplicate and results show mean +/- SEM.

**Supplemental Figure 6. AMIGO2 regulates multicellular aggregate dynamics.**

**(A)** MCAs were generated via the hanging drop method by seeding cells at a density of 1000 cells per 20  $\mu$ l droplet onto the lid of culture dishes. Dishes were gently inverted and allowed to aggregate for 2 days. MCAs were imaged using Echo Revolve hybrid microscopy in bright field and fluorescence modes. Shown are parental OVCAR5 cells, OVCAR5-IP3, OVCAR5-IP3-AMIGO2-KD or OVCAR5-IP plus anti-AMIGO2 antibody. **(B,C)** MCA areas ( $\mu\text{m}^2$ ) were measured using ImageJ and statistical analysis was performed using one-way ANOVA. Experiments were performed in triplicate and results show mean +/- SEM.

OVCAR5

OVCAR5-ip3

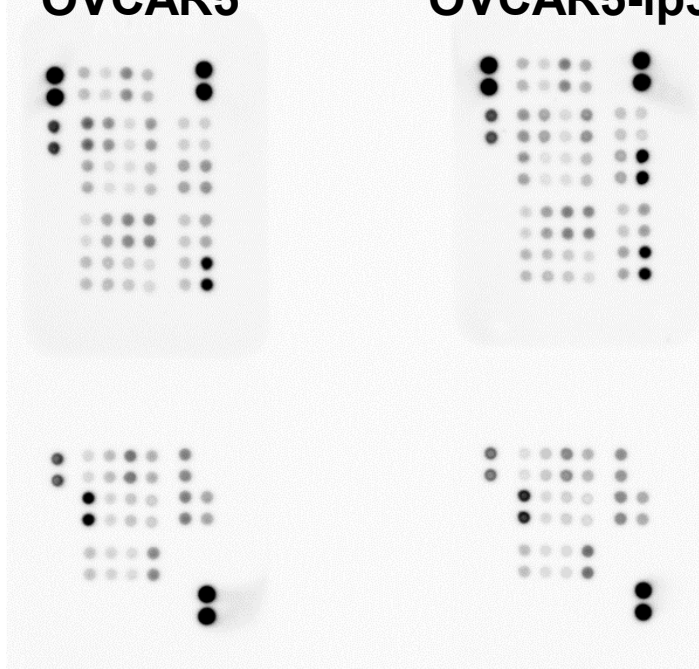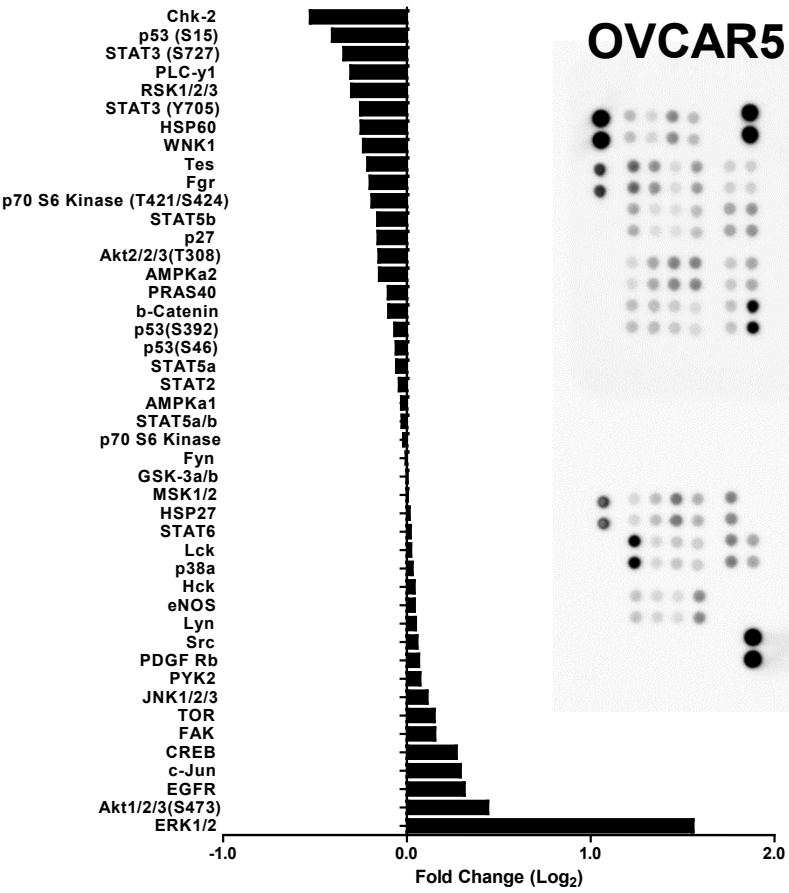

OVCAR8

OVCAR8-ip3

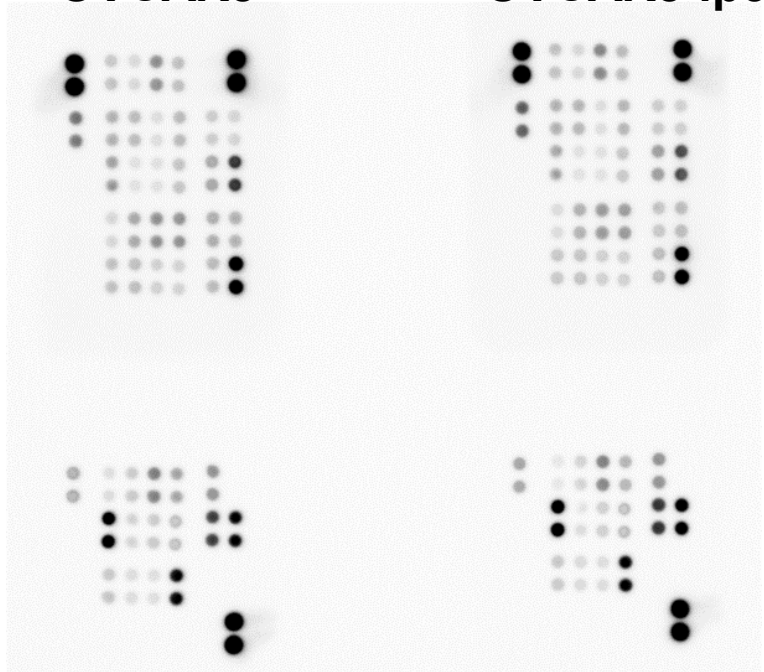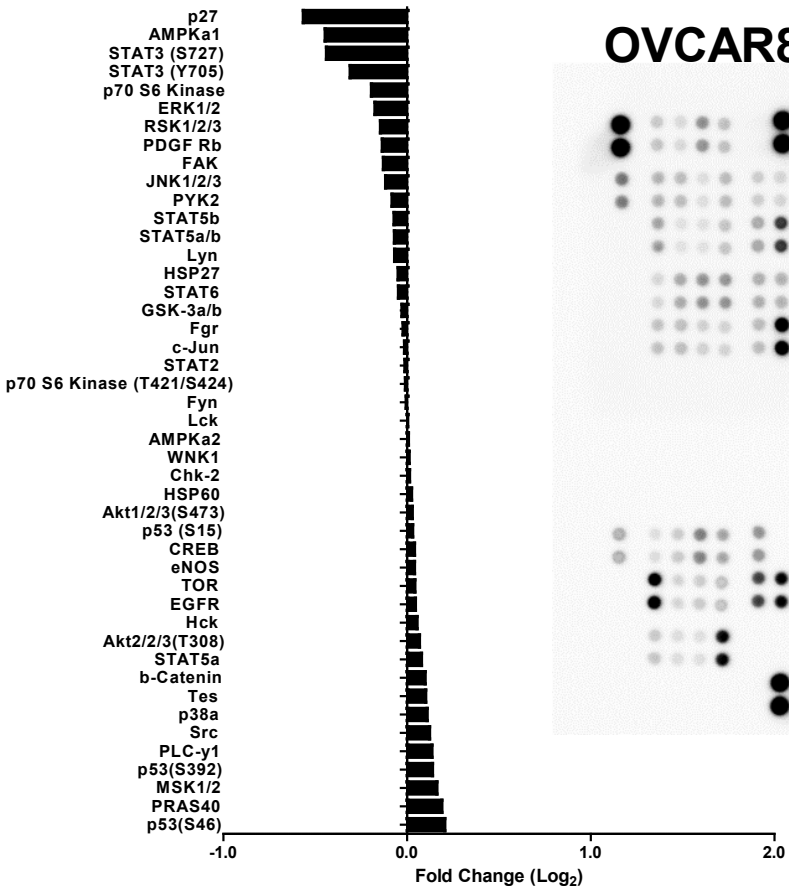

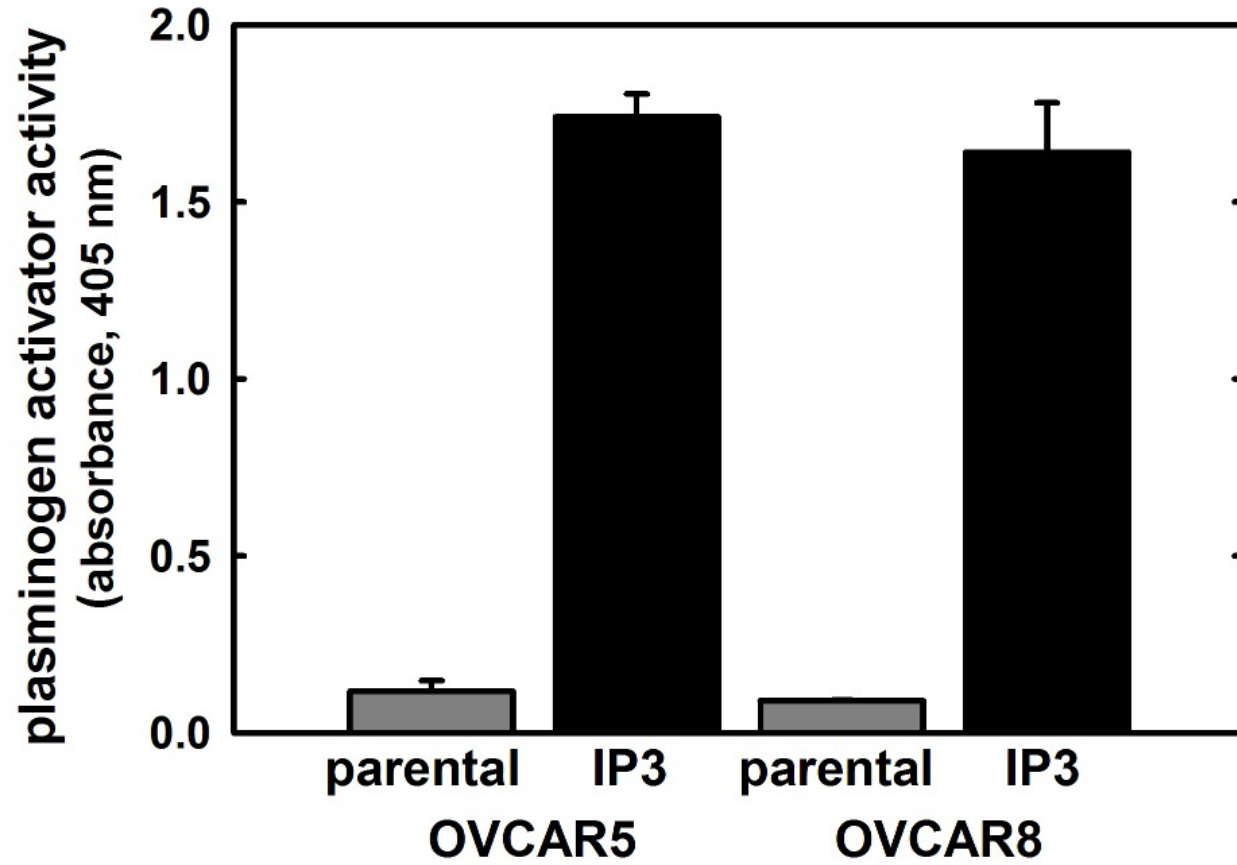

## A

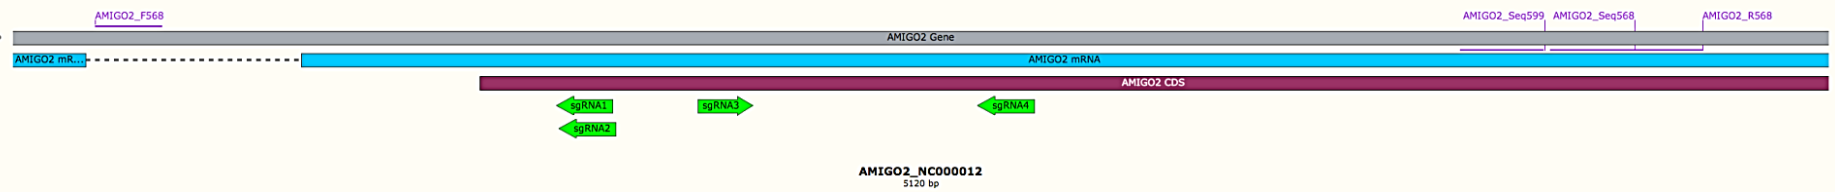

## B

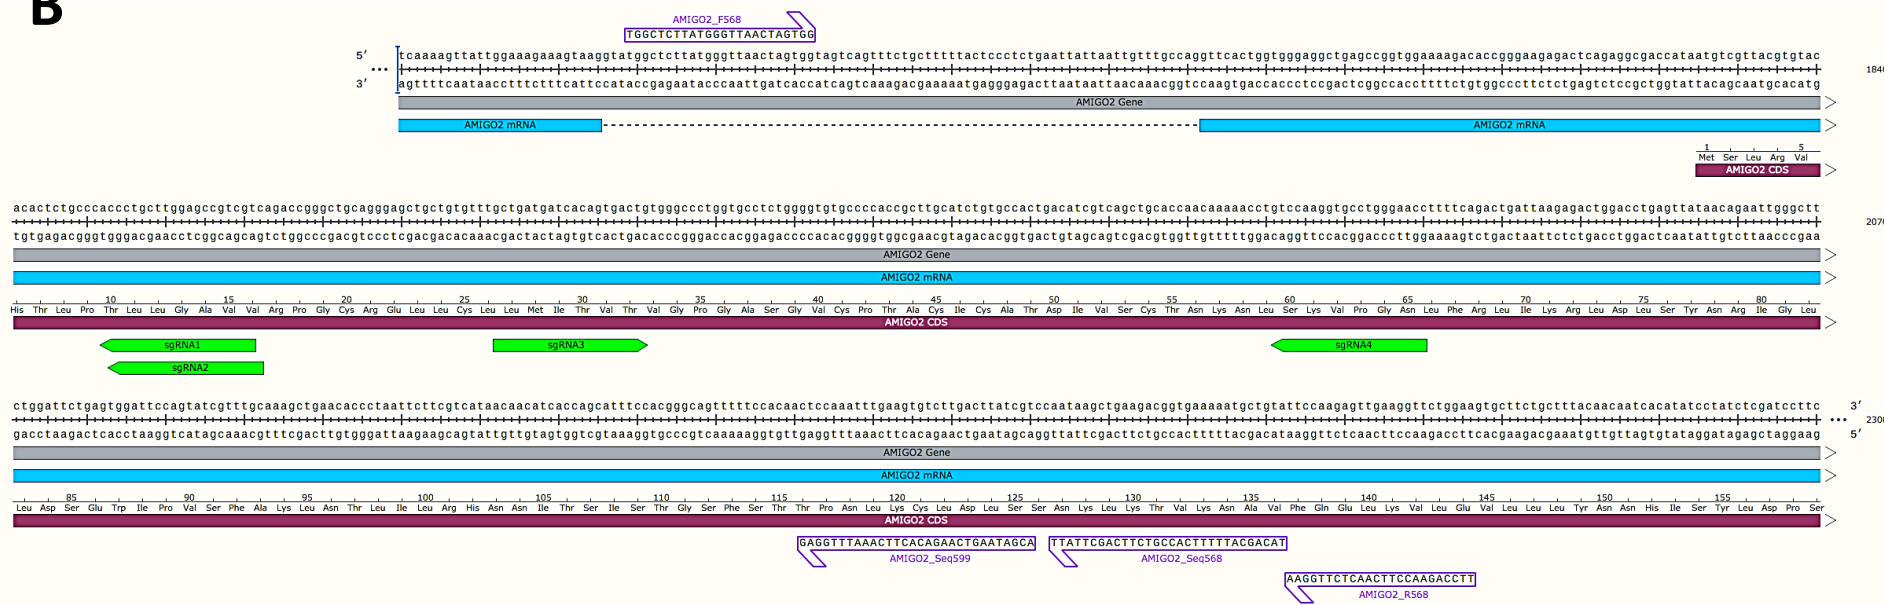

Liu et al., Suppl. Fig. 4

**A** DNA AMIGO2 sgRNA

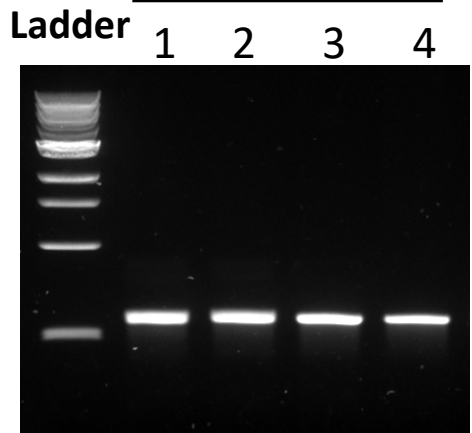

**B**

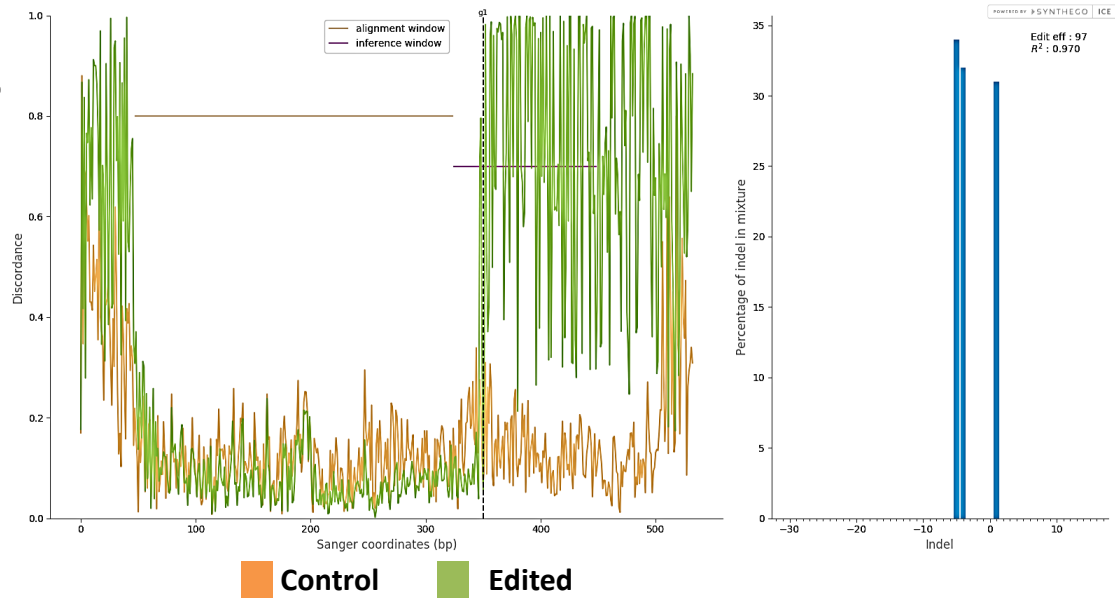

**C**

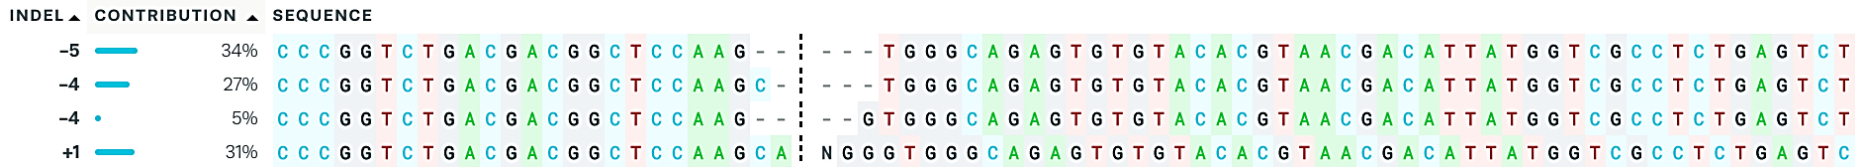

**D**

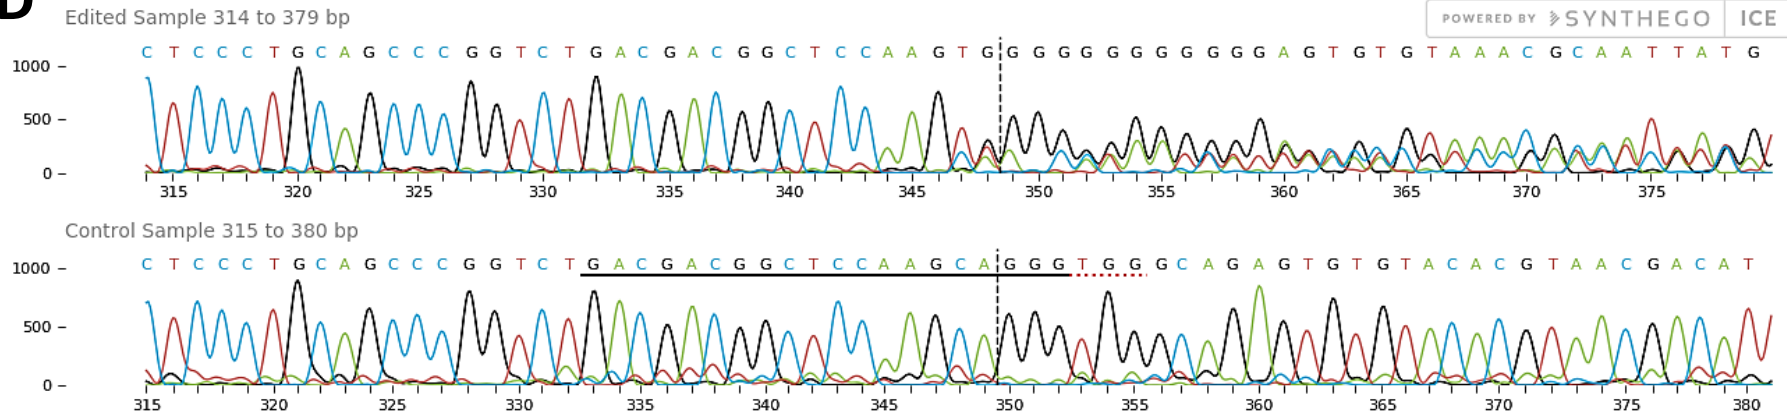

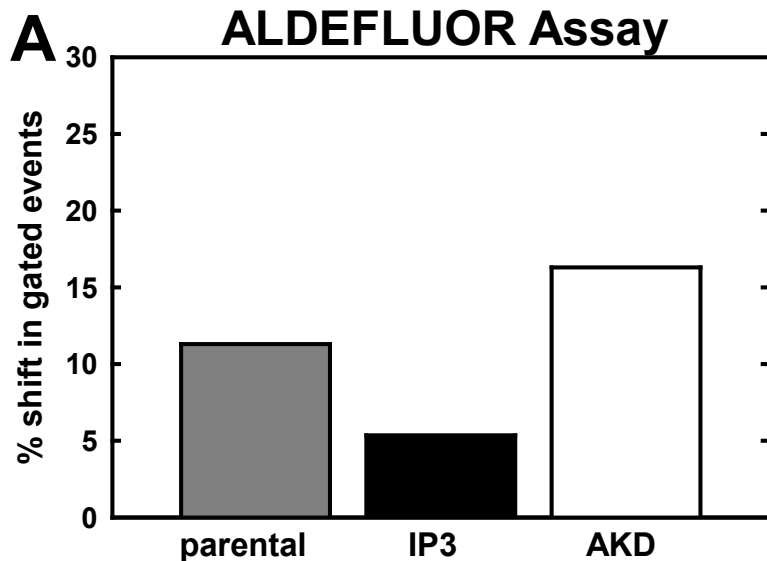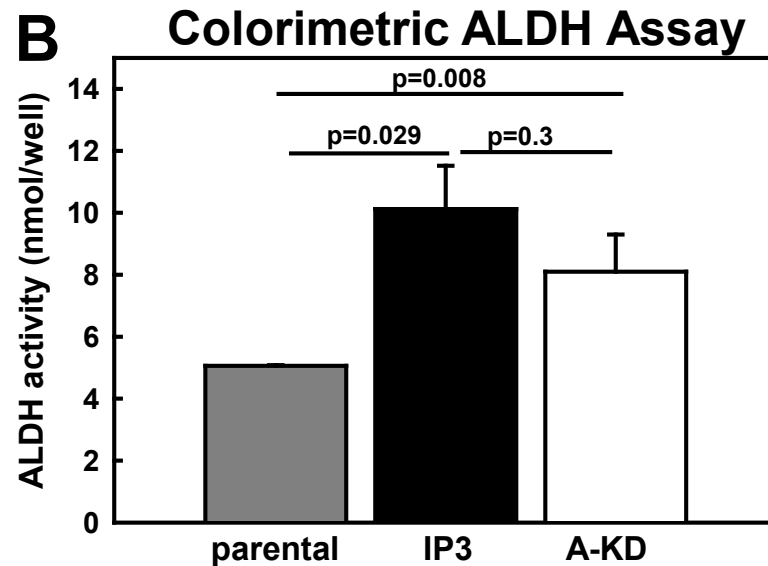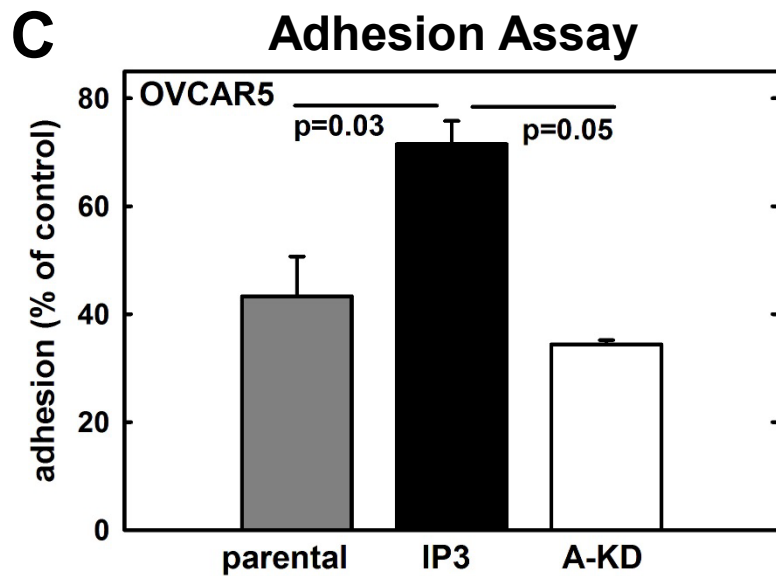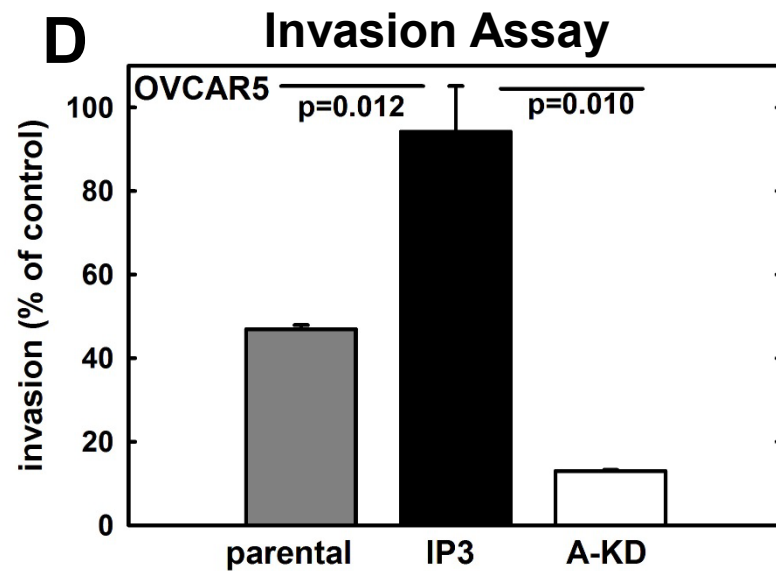



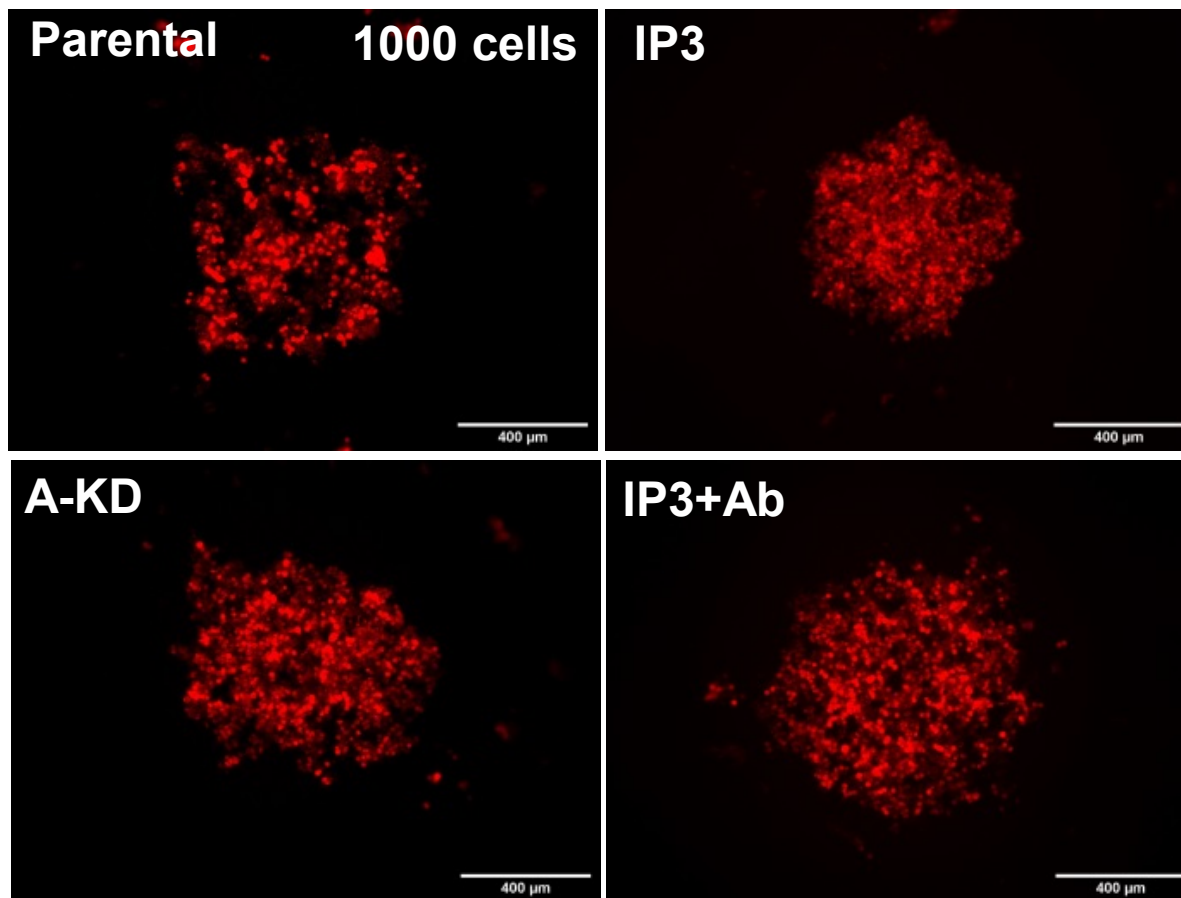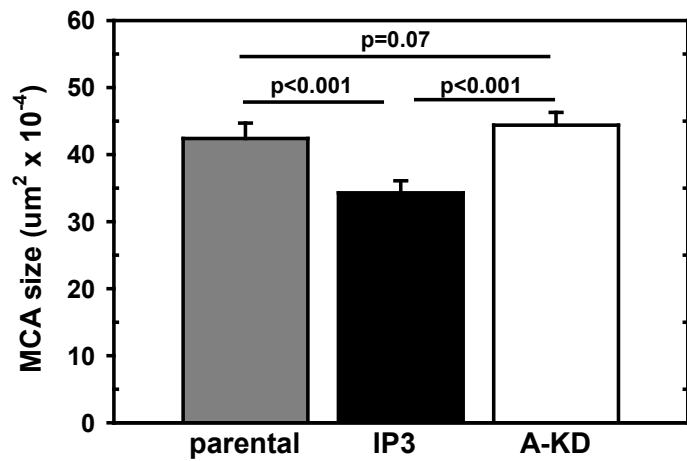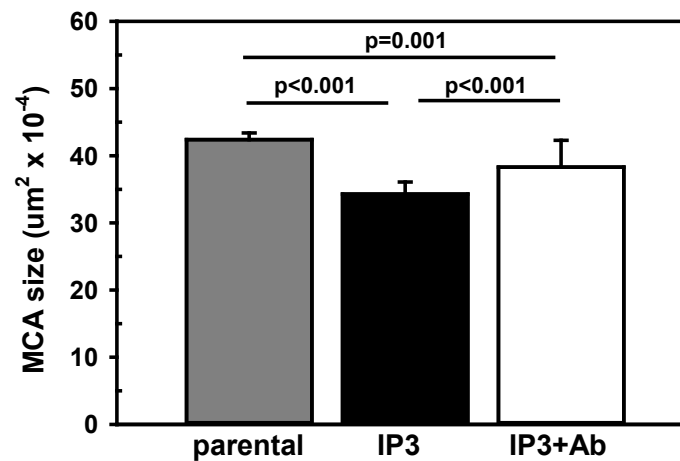

**Supplemental Table 1:** qPCR primers for validation of investigated genes and reference genes.

| Gene Symbol     | Gene Name                                           | Accession Number | Chromosomal Localization | Forward and Reverse Primer (5'→3')                           | Amplicon Size (bp) |
|-----------------|-----------------------------------------------------|------------------|--------------------------|--------------------------------------------------------------|--------------------|
| <b>AMIGO2</b>   | adhesion molecule with Ig like domain 2             | NM_181847        | 12q13.11                 | 5'-AGAGACTCAGAGGCGACCAT-3'<br>5'-ATCAGCAAACACAGCAGCTC-3'     | 104                |
| <b>COL6A3</b>   | collagen type VI alpha 3 chain                      | NM_004369        | 2q37.3                   | 5'-CTGTTGCAGGCAAATGTAAAG-3'<br>5'-CACAGGCTTCCCATCTAAAG-3'    | 121                |
| <b>FN1</b>      | fibronectin 1                                       | NM_001306129     | 2q35                     | 5'-GGAGATTCATGGGAGAAGTATG-3'<br>5'-GACCACTTGAGCTTGATAG-3'    | 115                |
| <b>IFI6</b>     | interferon alpha inducible protein 6                | NM_022873        | 1p35.3                   | 5'-CCTTCTGGCCTAACTCTTC-3'<br>5'-CAGTGTACTATGTTGCGATCT-3'     | 137                |
| <b>KISS1</b>    | KiSS-1 metastasis suppressor                        | NM_002256        | 1q32.1                   | 5'-CCCACCCTCTGGACATT-3'<br>5'-GAGTTCATCTTGGTGAGAAGAG-3'      | 133                |
| <b>PLAU</b>     | plasminogen activator, urokinase                    | NM_001145031     | 10q22.2                  | 5'-GCAGAGACACTAACGACTTC-3'<br>5'-CCAGCTTACTCACACTTAC-3'      | 125                |
| <b>PODXL</b>    | podocalyxin like                                    | NM_001018111     | 7q32.3                   | 5'-GCTGTAGTAGCTCTGATGAAAT-3'<br>5'-CAGACTGTGAGGAAGGAATTAG-3' | 122                |
| <b>SEC11C</b>   | SEC11 homolog C, signal peptidase complex subunit   | NM_033280        | 18q21.32                 | 5'-GAAGGACGAGACATTCCAATAG-3'<br>5'-ACAAGCCTCTATCATCAACTTC-3' | 115                |
| <b>SERPINE2</b> | serpin family E member 2                            | NM_006216        | 2q36.1                   | 5'-GGAACACTGTACTGAGGAATG-3'<br>5'-GAACTGGACAAACAGCAAATAC-3'  | 117                |
| <b>SPINT2</b>   | serine peptidase inhibitor, Kunitz type 2           | NM_021102        | 19q13.2                  | 5'-GAGGGATTGACTCGGATTTG-3'<br>5'-GGAGCCTCCTAGAGGATTT-3'      | 120                |
| <b>HPRT1</b>    | hypoxanthine phosphoribosyltransferase 1            | NM_000194        | Xq26.2-q26.3             | 5'-CTGGAAGAATGTCTTGATTGTG-3'<br>5'-GACCTTGACCATCTTTGGATTA-3' | 104                |
| <b>HSP90AB1</b> | heat shock protein 90 alpha family class B member 1 | NM_001271969     | 6p21.1                   | 5'-AAGAGAGCAAGGCAAAGTTTGAG-3'<br>5'-TGGTCACAATGCAGCAAGGT-3'  | 120                |

**Supplemental Table 2:** AMIGO2 guide RNA sequences

| <b>Label</b>         | <b>Amigo2 Guide RNA Sequence</b> |
|----------------------|----------------------------------|
| <b>Amigo2_sgRNA1</b> | A*C*G*ACGGCUCCAAGCAGG*G*U*       |
| <b>Amigo2_sgRNA2</b> | G*A*C*GACGGCUCCAAGCAG*G*G*       |
| <b>Amigo2_sgRNA3</b> | G*C*U*GAUGAUCACAGUGAC*U*G*       |
| <b>Amigo2_sgRNA4</b> | G*G*U*UCCCAGGCACCUUGG*A*C*       |

N\*N\*N\* indicate 2'-O-methyl analogues and 3'-phosphorothioate internucleotide linkages.

**Supplemental Table 3:** AMIGO2 primers for genomic DNA PCR and Sanger Sequencing

| <b>Application</b> | <b>Primer Name</b> | <b>Primer Sequence (5'-3')</b> | <b>Amplicon size (bp)</b> |
|--------------------|--------------------|--------------------------------|---------------------------|
| <b>Genomic PCR</b> | AMIGO2_F568        | TGGCTCTTATGGGTAACTAGTGG        | 568                       |
|                    | AMIGO2_R568        | TTCCAGAACCTTCAACTCTTGAA        |                           |
| <b>Sequencing</b>  | AMIGO2_Seq568      | TACAGCATTTTTCACCGTCTTCAGCTTATT | /                         |
|                    | AMIGO2_Seq599      | ACGATAAGTCAAGACACTTCAAATTTGGAG | /                         |

**Supplemental Table 4:** Summary of AMIGO2 sgRNAs-edited OVCAR5-IP3 single cell sorting for clonal expansion

| <b>AMIGO2 sgRNAs-edited OVCAR5-IP3</b>                             | <b>sgRNA2</b> | <b>sgRNA3</b> |
|--------------------------------------------------------------------|---------------|---------------|
| <b>Wells of sorted single cell (in 3 plates of 96-well plates)</b> | 288           | 288           |
| <b>Wells with live cells</b>                                       | 173           | 168           |
| <b>% of well have &gt; 1 cell</b>                                  | 11%           | 59%           |
| <b>% of well have single cell that died</b>                        | 68%           | 20%           |
| <b>% of well have live single cell clones</b>                      | 36 (21%)      | 36 (21%)      |
